# Supplementary material
Source: PubMed Central journal article supplement (PMC4081325)
Supplement: supp_pp.114.238873_238873Supplemental_Figure_1.pdf [file supp_pp.114.238873_238873Supplemental_Figure_1.pdf]

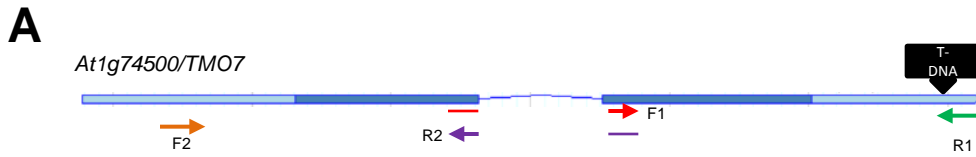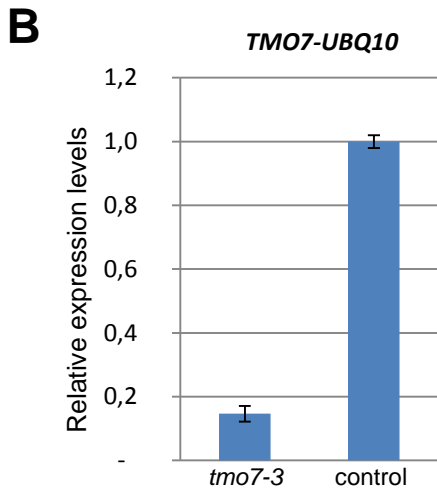

**Supplemental Figure 1: TMO7 expression is reduced in *tmo7-3*.** **A)** Graphic representation of the *TMO7* gene structure. Primers used qRT-PCR are labeled and the sequences are given below. **B)** Total RNA was extracted from roots of 7 days old *tmo7-3* (SALK\_129876) mutant and from wild type seedlings. This total RNA was used as template for cDNA synthesis using random primer. The expression levels are relative to that of *UBQ10* and normalized to the value in WT seedlings, arbitrarily set at 1. Values are means of three biological replicates ( $\pm$ SE). Graph shows the expression of *TMO7* when primers F2 and R2 were used. Opposite, when we used primers F1 and R1 we did not get any *TMO7* amplification in the *tmo7-3* mutant since, as predictable, the fragment expected was interrupted by the T-DNA insertion.

Primers sequences:

F1: CGTCCGACAAGGTTTCAGCAG \*

R1: GACGAACTCGTATCATTAAACG

F2: CATAACTTCTGTGTTACCCTA

R2: CTGCTGAAACCTTGTCGGAACG \*

\* primer designed in an intron-exon junction to avoid genomic DNA amplification.
